# Supplementary material
Source: Springer Nature journal article supplement (https://www.springermedizin.de/resource/supplementary/12880_2012_187_MOESM5_ESM.pdf/9450186)

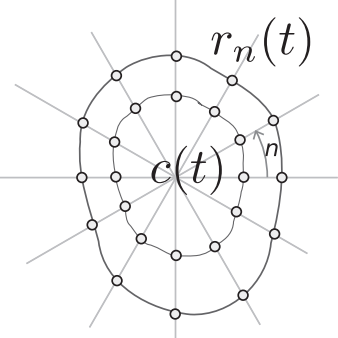

$n$

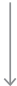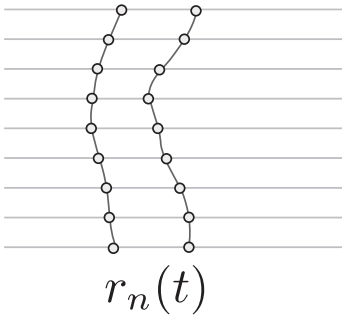

Supplement: MOESM5 [file 9450186]
